# Supplementary material for: A facile method for the preparation of aliphatic main-chain benzoxazine copolymers with high-frequency low dielectric constants
Source: Royal Society of Chemistry journal article supplement (doi:10.1039/c8py00407b), 2018-01-01
Supplement: c8py00407b1.pdf [file c8py00407b1.pdf]

**Supplementary data**

**Facile preparation of aliphatic main-chain benzoxazine copolymers  
with high-frequency low dielectric constants**

Ming Zeng<sup>a, b\*</sup>, Jiangbing Chen<sup>b</sup>, Qingyu Xu<sup>b\*</sup>, Yiwan Huang<sup>b†</sup>, Zijian Feng<sup>b</sup>, Yi Gu<sup>c</sup>

*<sup>a</sup>Engineering Research Center of Nano-Geomaterials of Ministry of Education,  
Faculty of Materials Science and Chemistry, China University of Geosciences, Wuhan  
430074, P. R. China*

*<sup>b</sup>Faculty of Materials Science and Chemistry, China University of Geosciences,  
Wuhan 430074, P. R. China*

*<sup>c</sup>State Key Laboratory of Polymer Materials Engineering, Sichuan University,  
Chengdu 610000, P. R. China*

---

\*Corresponding author. Tel: +86 18064129618.

ORCID ID: 0000-0002-1996-2168

*E-mail address:* zengming318@163.com (M. Zeng).

\*Corresponding author. Tel: +86 13886007392.

*E-mail address:* qyuxu99@126.com (Q. Xu).

†The present address of Yiwan Huang: Graduate School of Life Science, Hokkaido University, Sapporo 060-0810, Japan

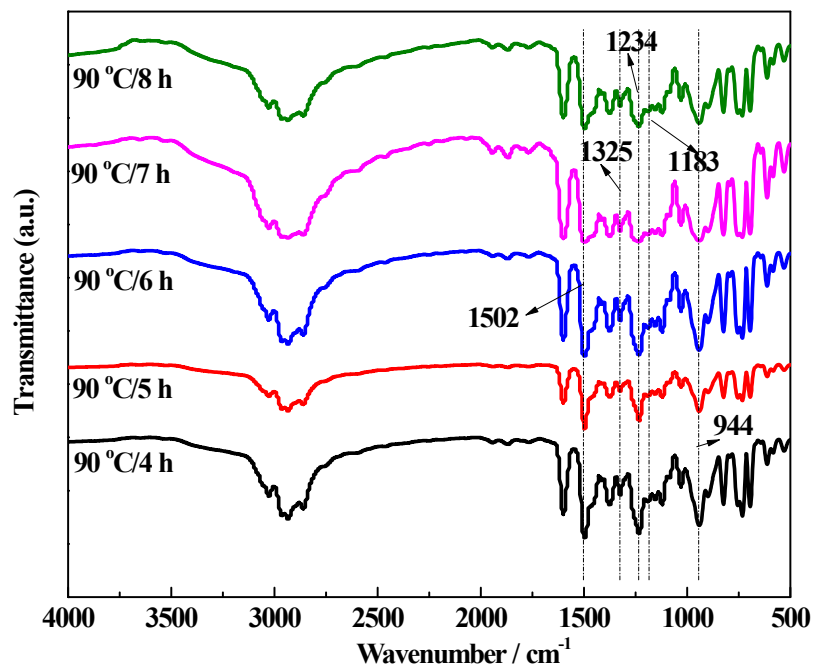

Fig. S1 FTIR spectra of benzoxazine copolymer prepolymer synthesized in toluene at 90 °C.

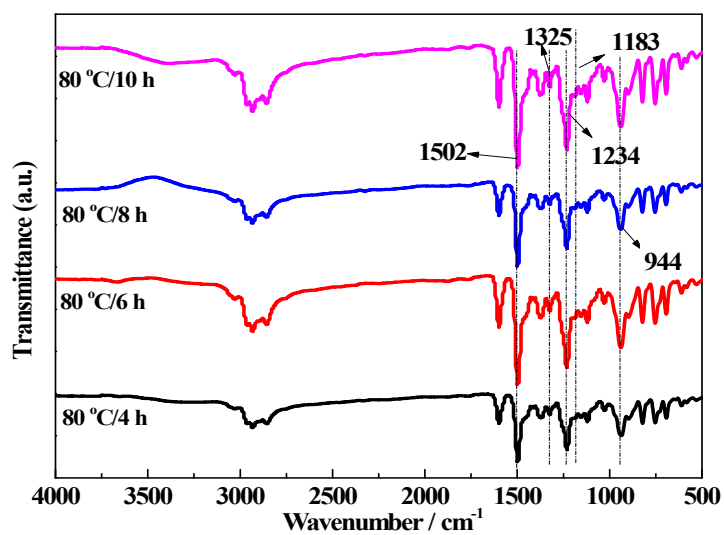

Fig. S2 FTIR spectra of benzoxazine copolymer prepolymer synthesized in toluene/ethanol at 80 °C.

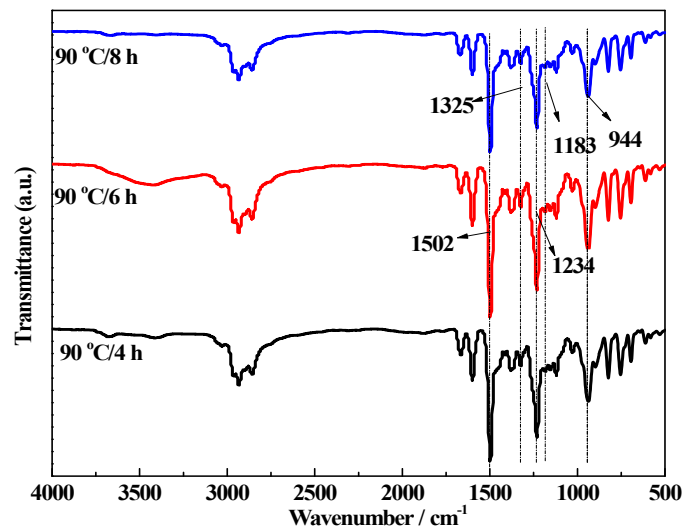

Fig. S3 FTIR spectra of benzoxazine copolymer prepolymer synthesized in toluene/DMF at 90 °C.

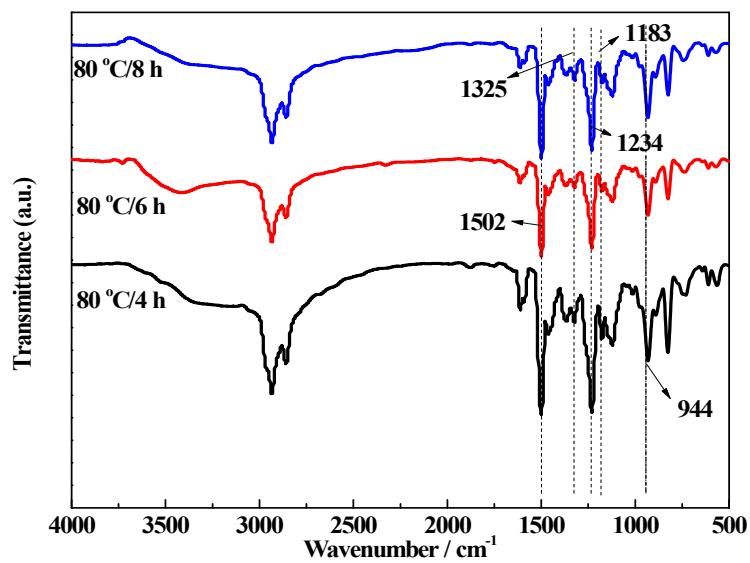

Fig. S4 FTIR spectra of DAH based main-chain benzoxazine oligomer synthesized in toluene/ethanol.

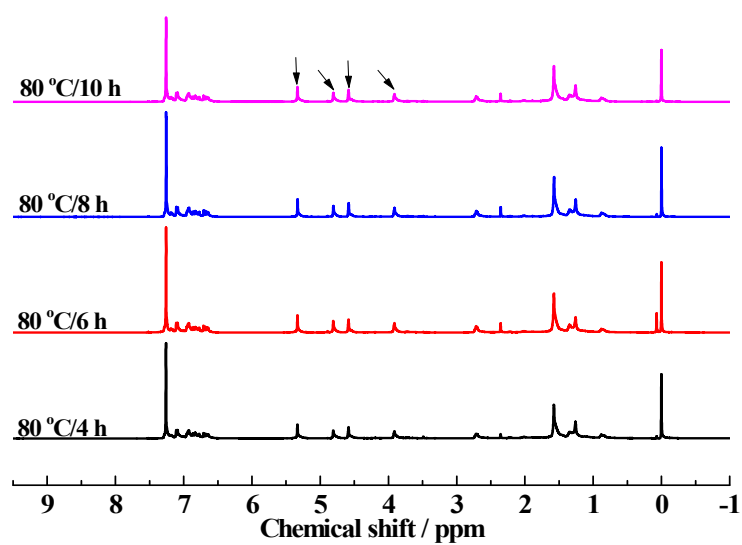

Fig. S5 <sup>1</sup>H-NMR spectra of benzoxazine copolymer prepolymer synthesized in toluene/ethanol at 80 °C.

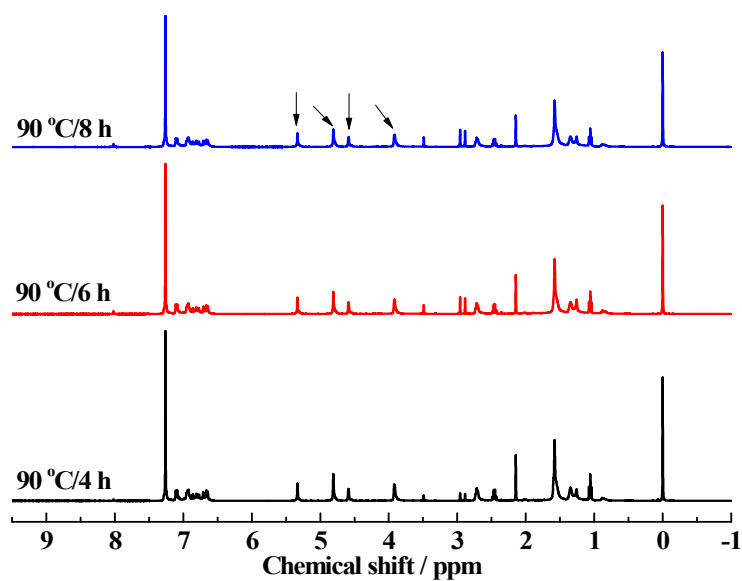

Fig. S6 <sup>1</sup>H-NMR spectra of benzoxazine copolymer prepolymer synthesized in toluene/DMF at 90 °C.

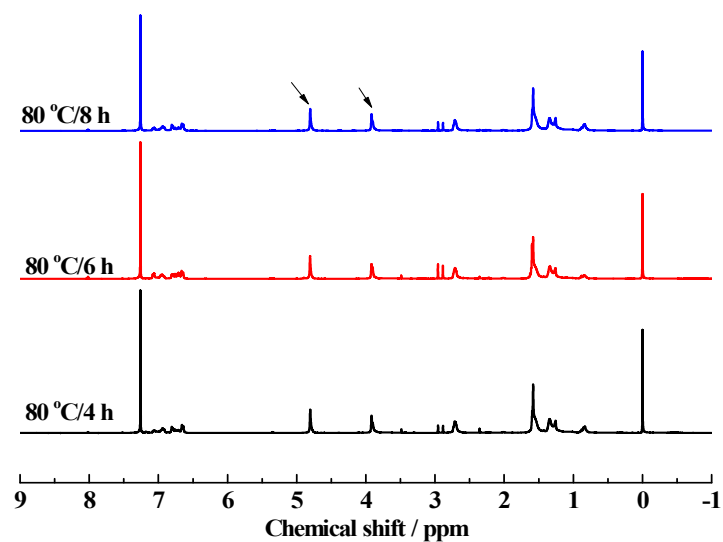

Fig. S7 <sup>1</sup>H-NMR spectra of DAH based main-chain benzoxazine oligomer synthesized in toluene/ethanol.

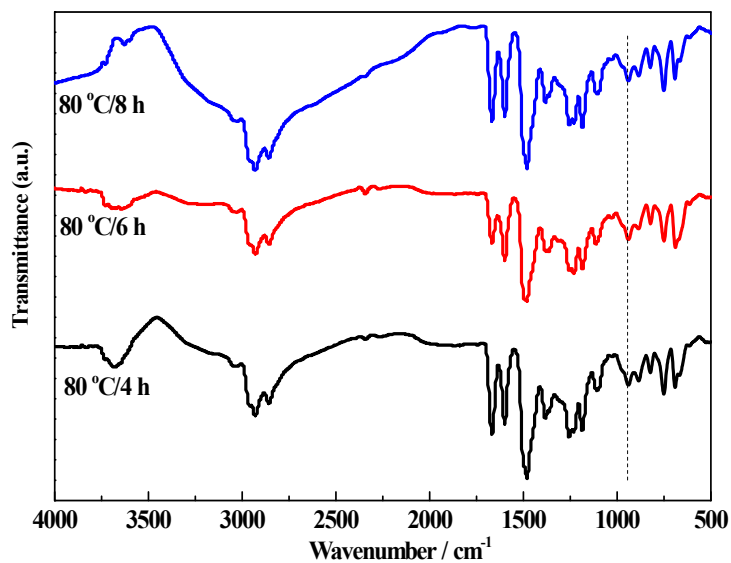

Fig. S8 FTIR spectra of benzoxazine copolymer prepolymer synthesized at 80 °C in toluene after curing.

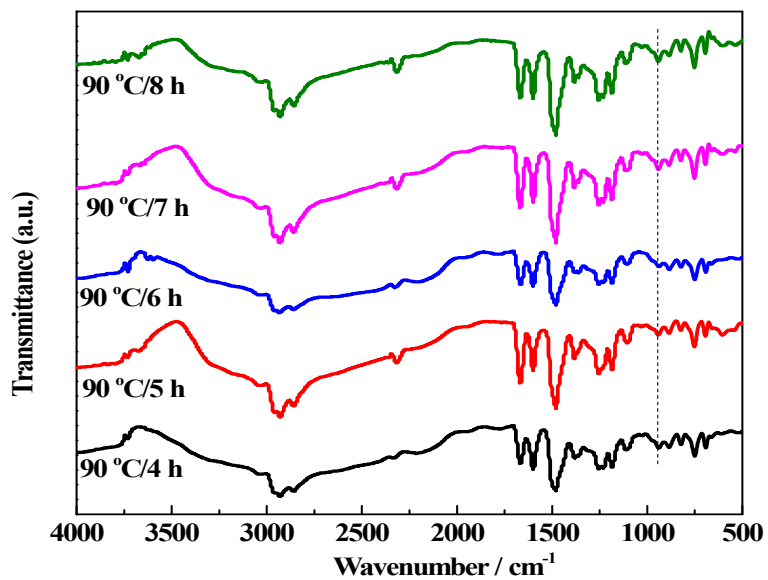

Fig. S9 FTIR spectra of benzoxazine copolymer prepolymer synthesized at 90 °C in toluene after curing.

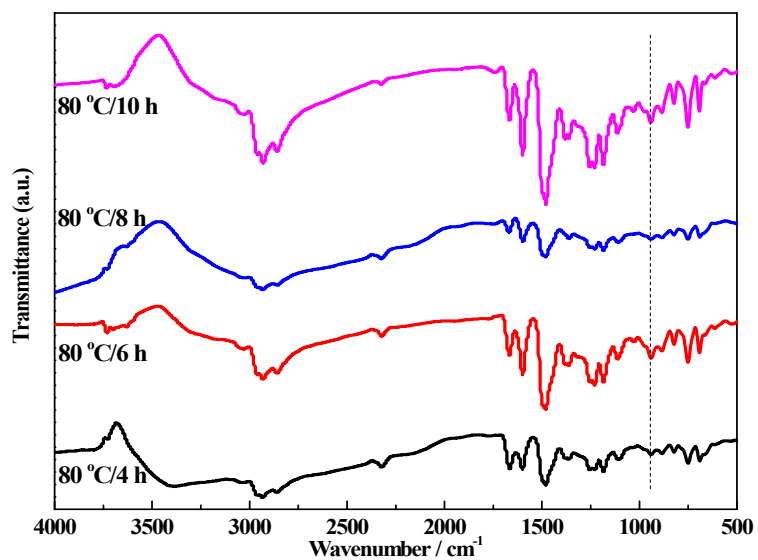

Fig. S10 FTIR spectra of benzoxazine copolymer prepolymer synthesized at 80 °C in toluene/ethanol after curing.

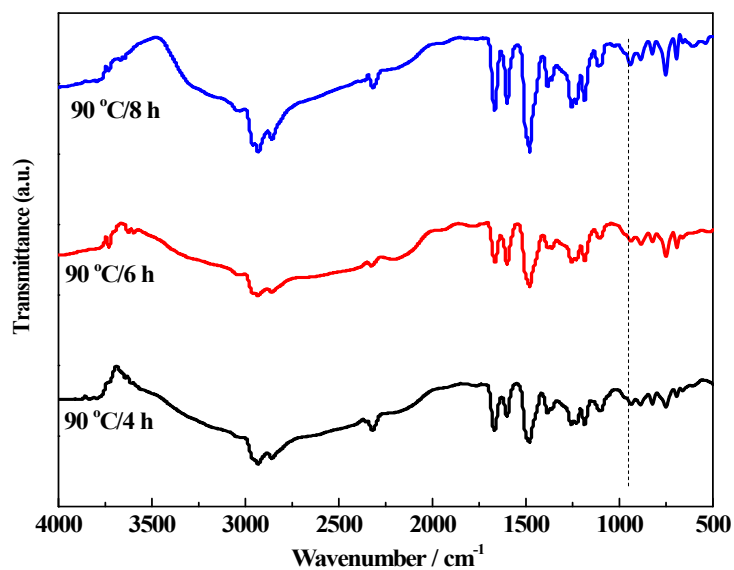

Fig. S11 FTIR spectra of benzoxazine copolymer prepolymer synthesized at 90 °C in toluene/DMF after curing.

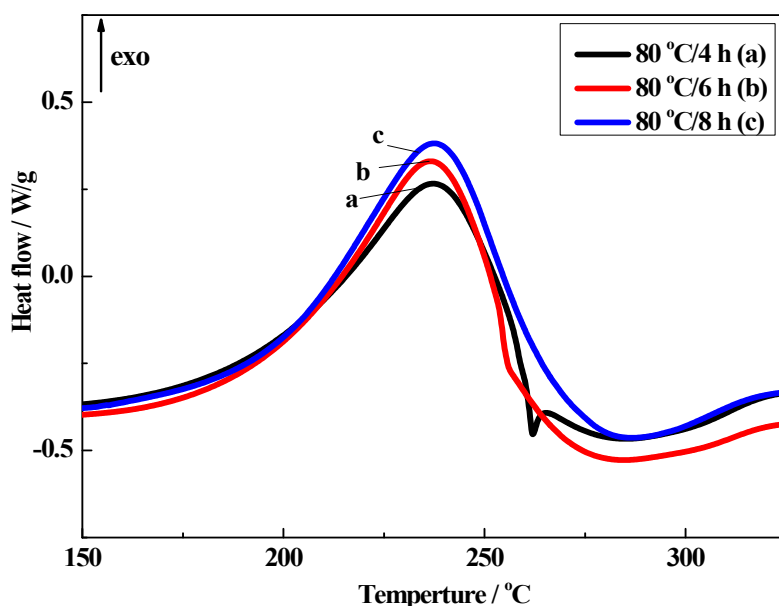

Fig. S12 DSC thermograms of BAH copolymer oligomers synthesized in toluene at 80 °C.

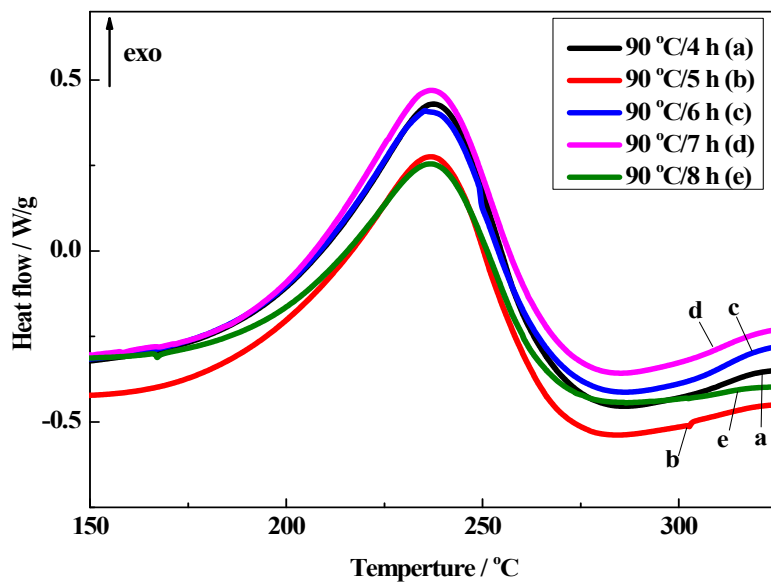

Fig. S13 DSC thermograms of BAH copolymer oligomers synthesized in toluene at 90 °C.

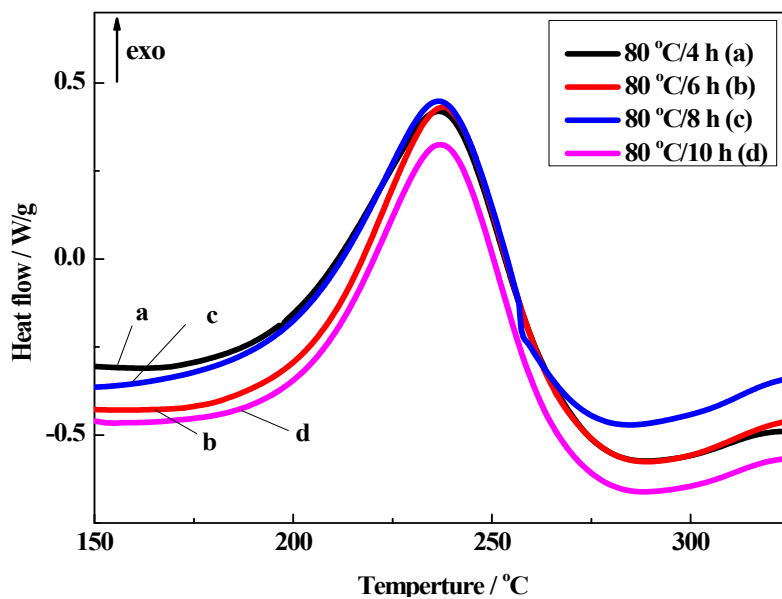

Fig. S14 DSC thermograms of benzoxazine copolymer prepolymer synthesized in toluene/ethanol.



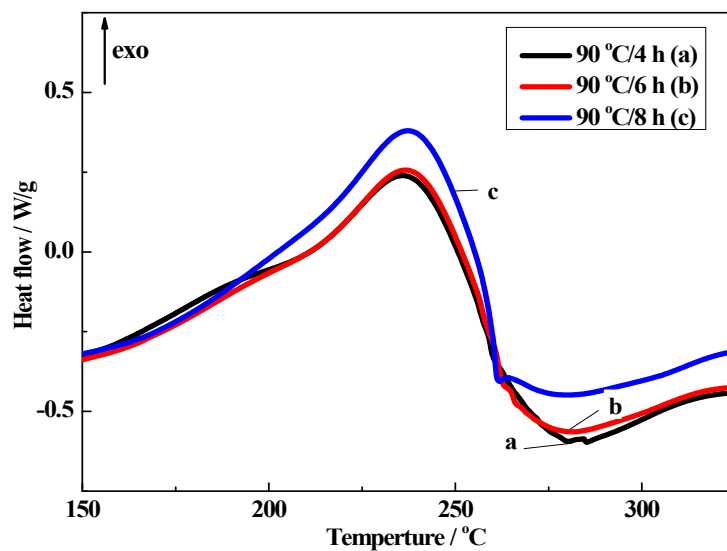

Fig. S15 DSC thermograms of benzoxazine copolymer prepolymer synthesized in toluene/DMF.

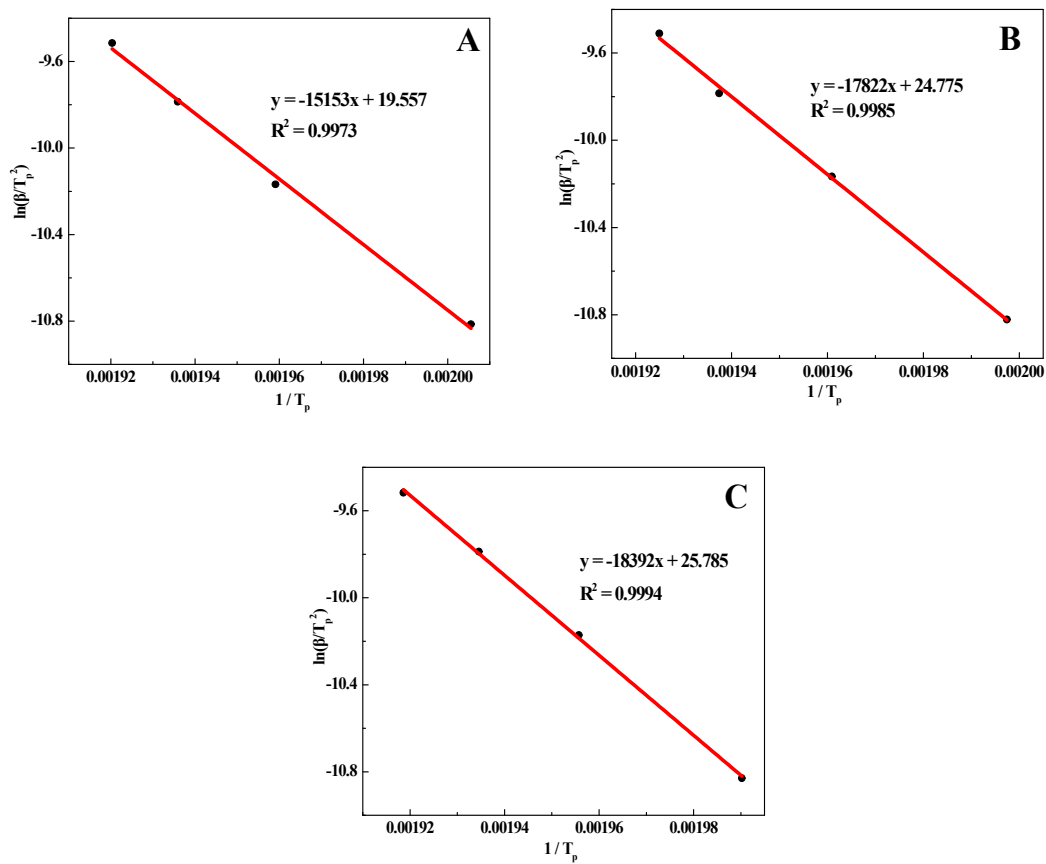

Fig. S16 Kissinger plots of  $\ln(\beta/T_p^2)$  and  $1/T_p$  for BAH copolymer oligomers synthesized in toluene at 80 °C (A) 4 h, (B) 6 h, (C) 8 h.

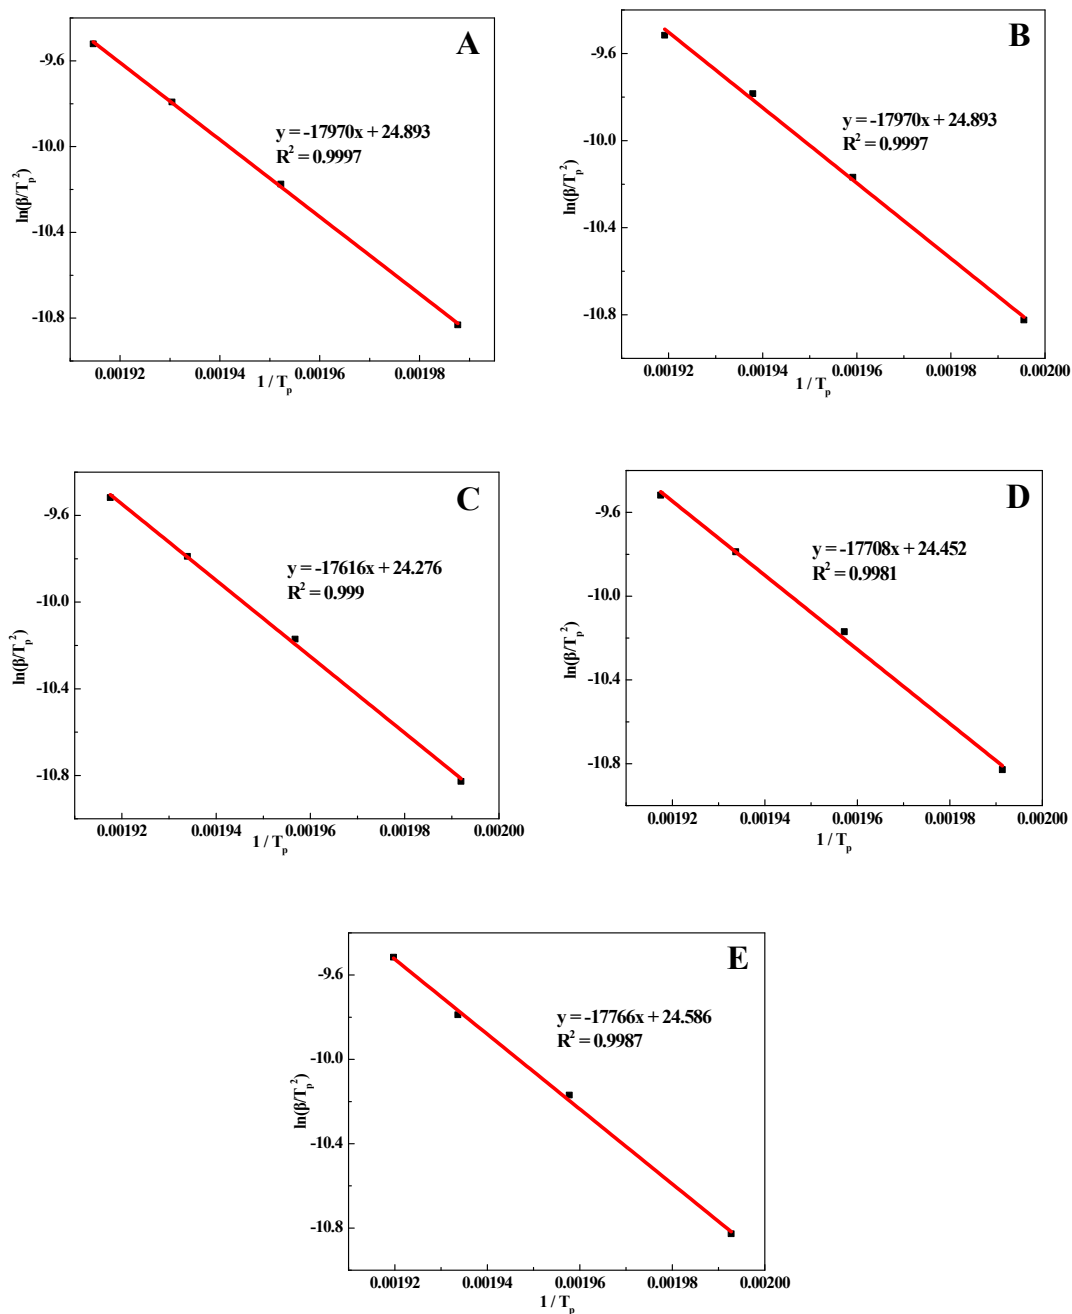

Fig. S17 Kissinger plots of  $\ln(\beta/T_p^2)$  and  $1/T_p$  for BAH copolymer oligomers synthesized in toluene at 90 °C (A) 4 h, (B) 5 h, (C) 6 h, (D) 7 h, (E) 8 h.

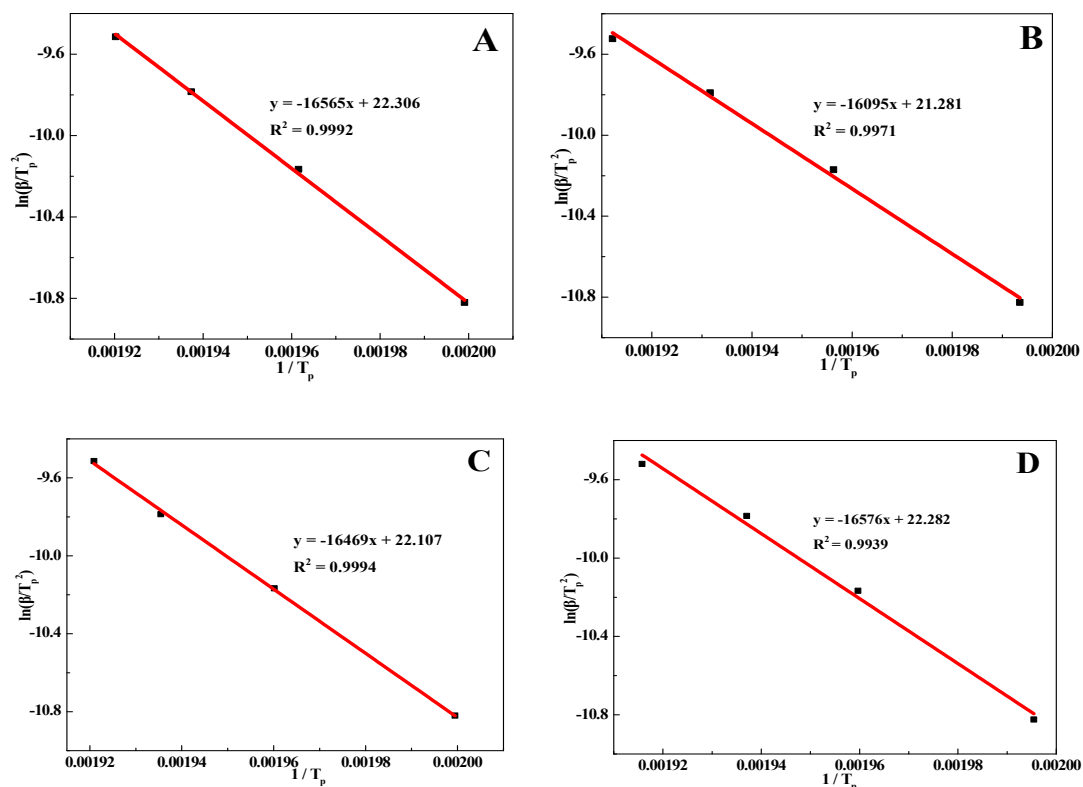

Fig. S18 Kissinger plots of  $\ln(\beta/T_p^2)$  and  $1/T_p$  for BAH copolymer oligomers synthesized in toluene/ethanol (A) 4 h, (B) 6 h, (C) 8 h, (D) 10 h.

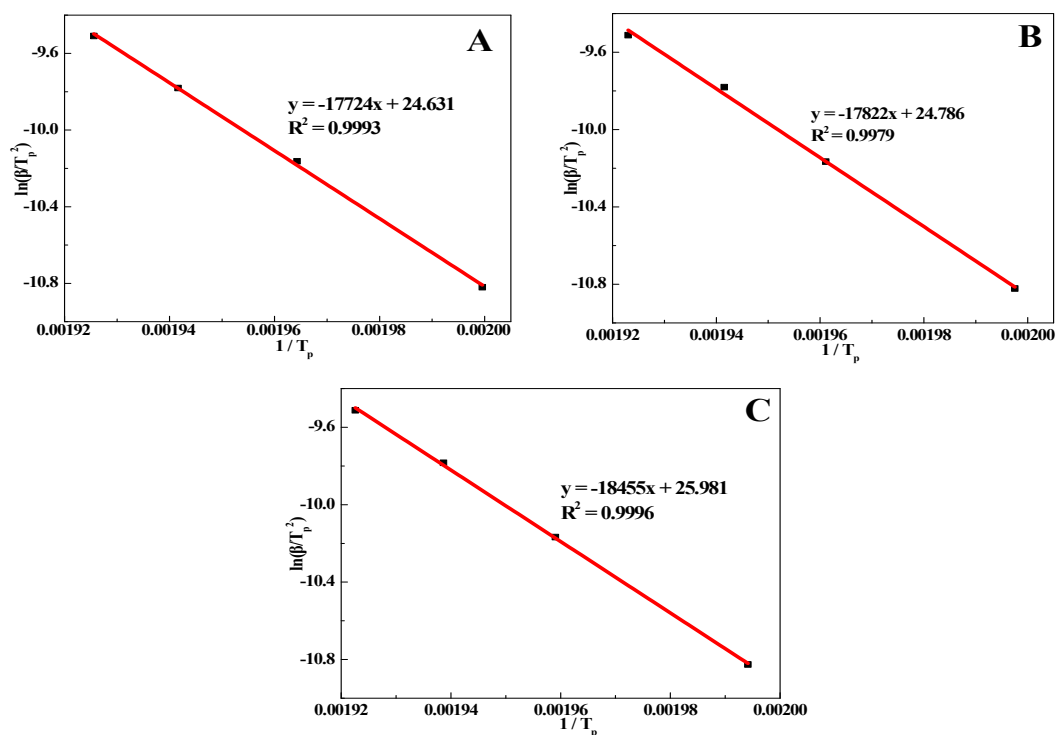

Fig. S19 Kissinger plots of  $\ln(\beta/T_p^2)$  and  $1/T_p$  for BAH copolymer oligomers synthesized in

toluene/DMF (A) 4 h, (B) 6 h, (C) 8 h.

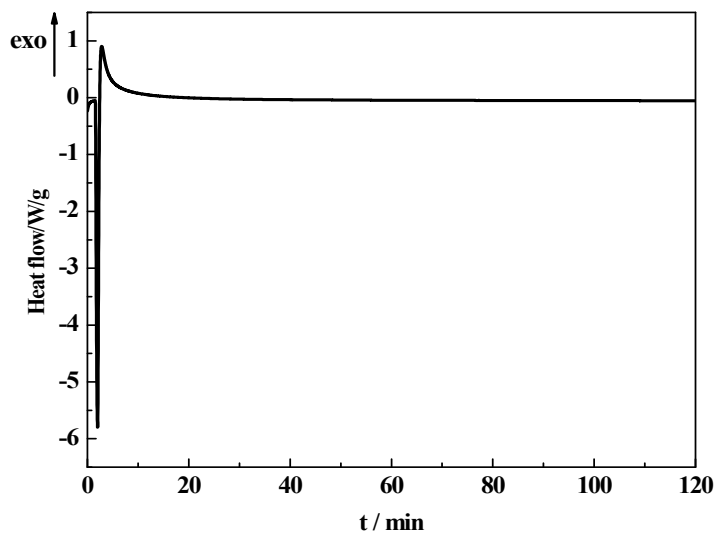

Fig. S20 The curing behavior of BAH-15 copolymer oligomer synthesized in toluene/DMF at 90 °C for 8 h observed by isothermal DSC at 210 °C.

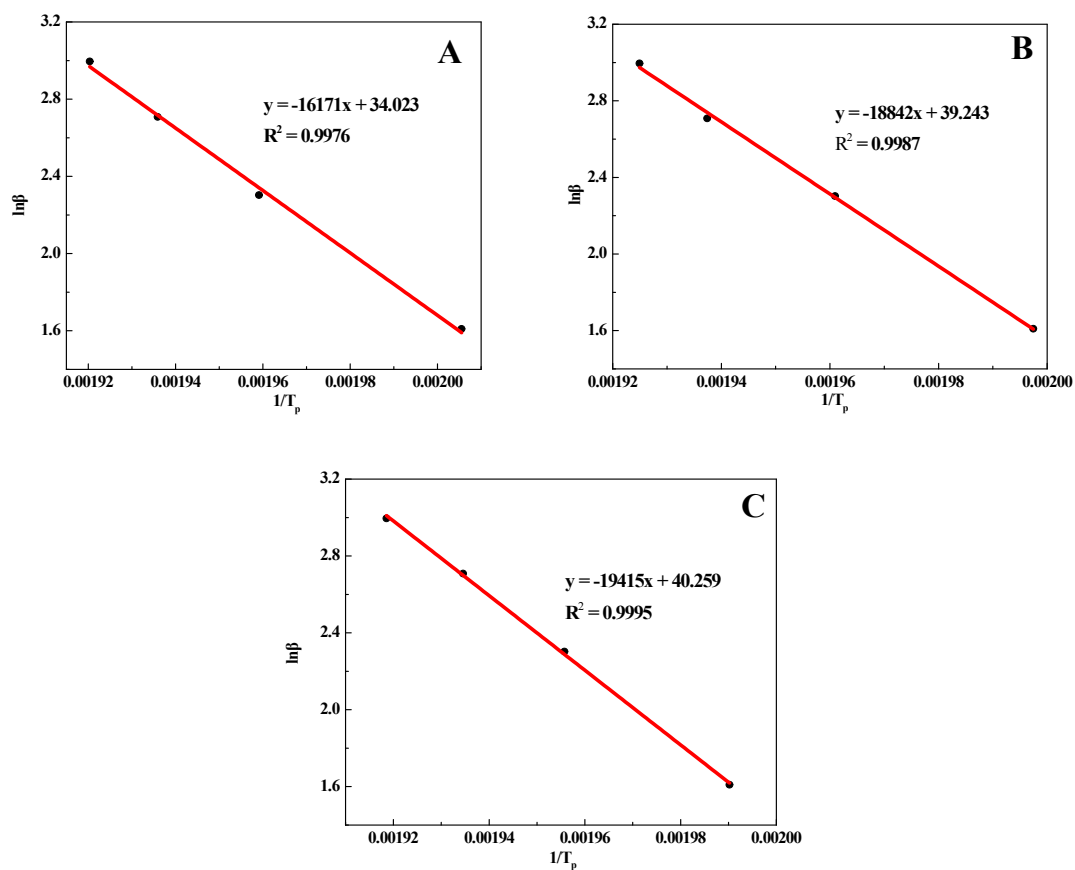

Fig. S21 The Crane plot of  $\ln\beta$  and  $1/T_p$  for BAH copolymer oligomer synthesized in toluene at 80 °C (A) 4 h, (B) 6 h, (C) 8 h.

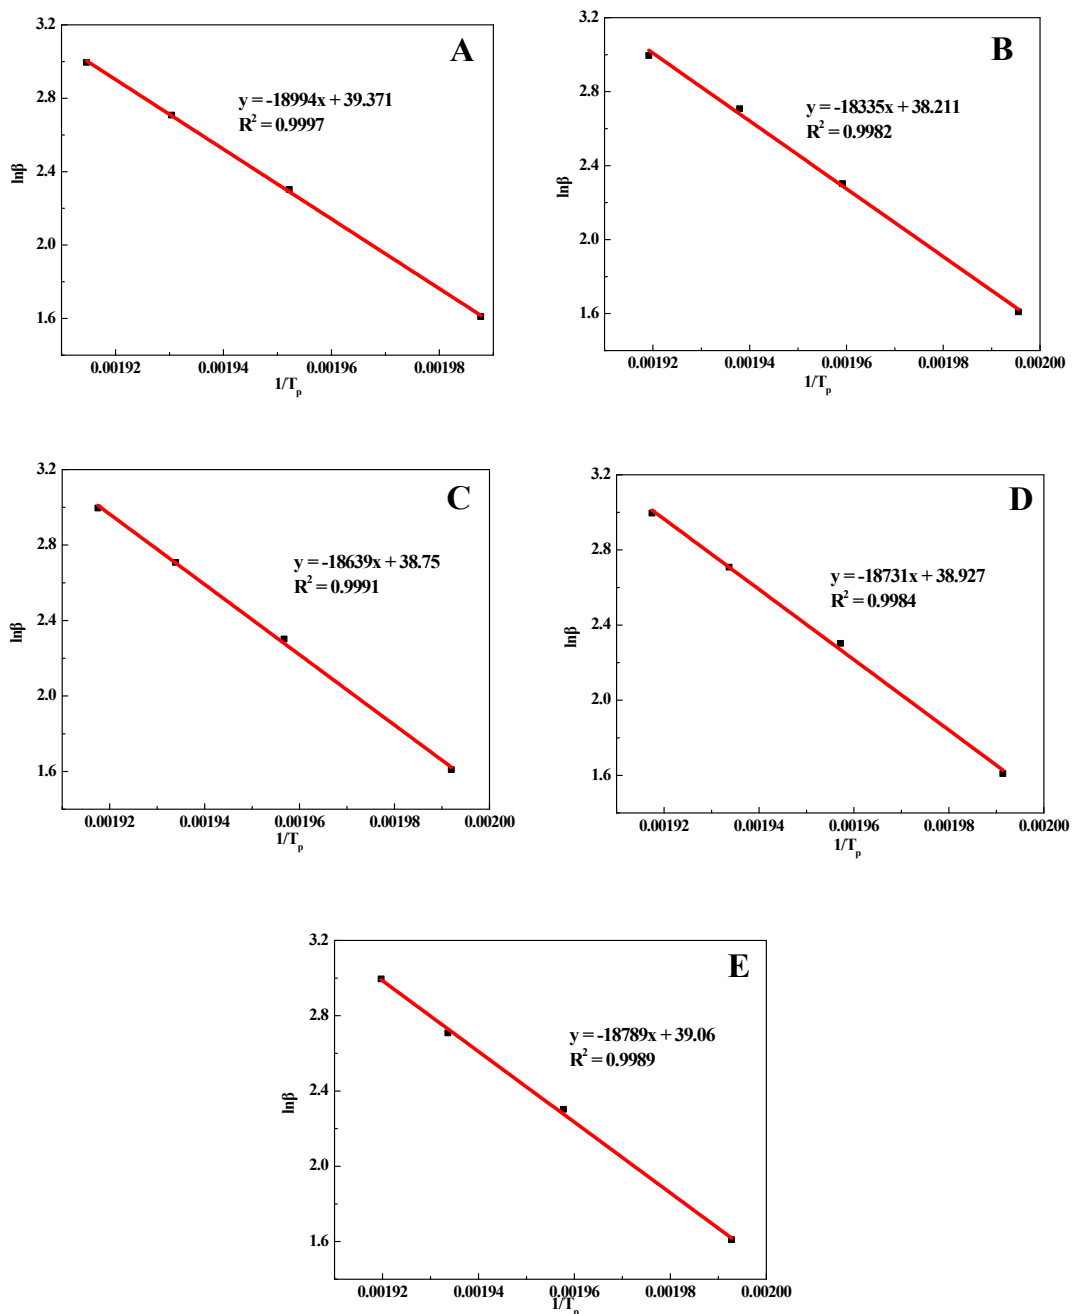

Fig. S22 The Crane plot of  $\ln\beta$  and  $1/T_p$  for BAH copolymer oligomer synthesized in toluene at 90 °C (A) 4 h, (B) 5 h, (C) 6 h, (D) 7 h, (E) 8 h.

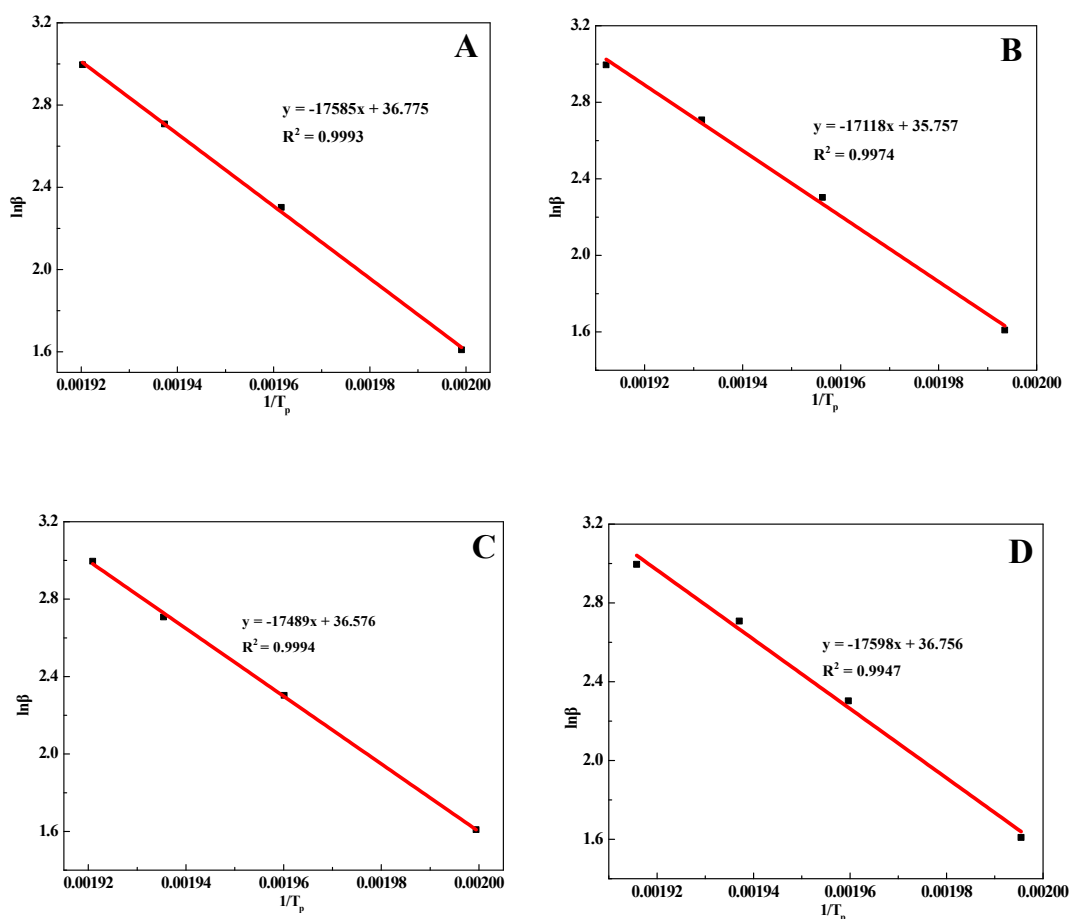

Fig. S23 The Crane plots of  $\ln\beta$  and  $1/T_p$  for BAH copolymer oligomer synthesized in toluene/ethanol (A) 4 h, (B) 6 h, (C) 8 h, (D) 10 h.

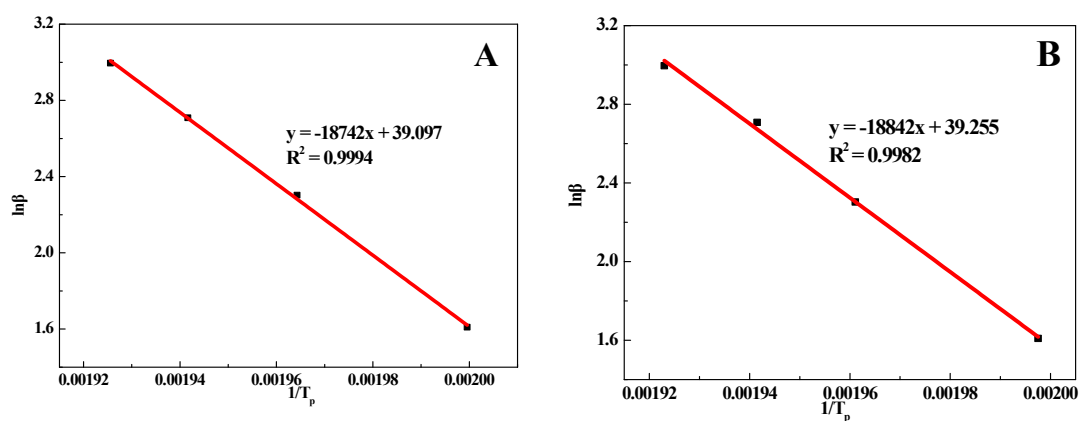

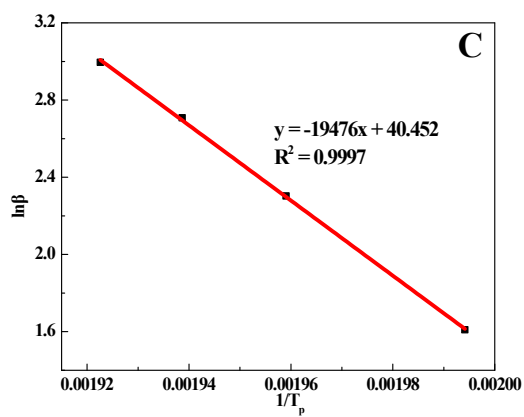

Fig. S24 The Crane plots of  $\ln\beta$  and  $1/T_p$  for BAH copolymer oligomer synthesized in toluene/DMF (A) 4 h, (B) 6 h, (C) 8 h.
